# Supplementary material for: Micromotor-assisted fluorescence detection of Hg2+ with bio-inspired AO–Mn2O3/γ-AlO(OH)
Source: Royal Society of Chemistry journal article supplement (doi:10.1039/d1en00796c), 2021-01-01
Supplement: d1en00796c1.pdf [file d1en00796c1.pdf]

## Micromotor-assisted fluorescence detection of $\text{Hg}^{2+}$ by bio-inspired $\text{AO-Mn}_2\text{O}_3/\gamma\text{-AlO(OH)}$

### Supporting information

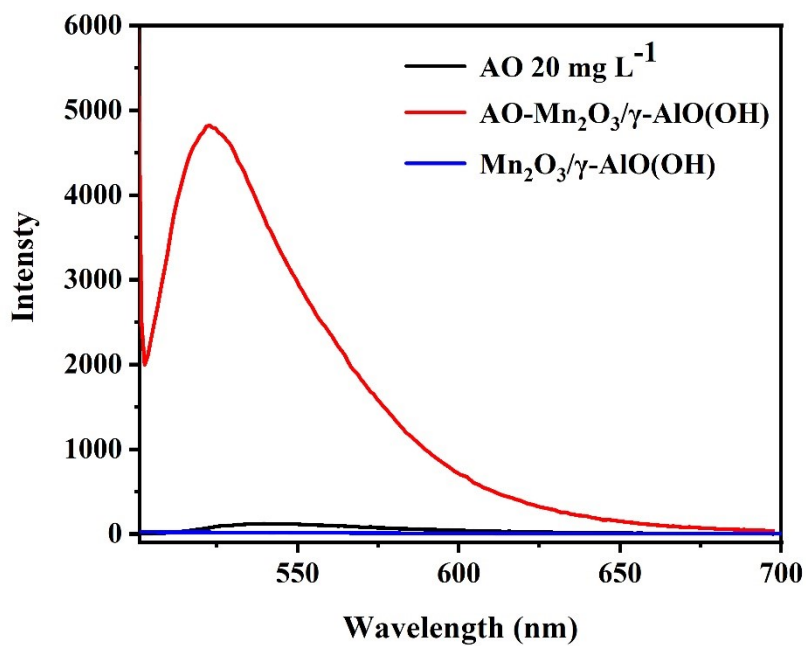

**Fig.S1** Fluorescence emission spectra of AO, AO-Mn<sub>2</sub>O<sub>3</sub>/γ-AlO(OH), and Mn<sub>2</sub>O<sub>3</sub>/γ-AlO(OH)
